# Supplementary material for: Simple Rules for Complex Near-Glass-Transition Phenomena in Medium-Sized Schiff Bases
Source: MDPI journal article supplement (doi:10.3390/ijms23095185), 2022-05-06
Supplement: s1 [file s1]

# Simple Rules For Complex Near-Glass-Transition Phenomena in Medium-Sized Schiff Bases

## *Supplementary Materials*

Andrzej Nowok <sup>1</sup>, Wioleta Cieřlik <sup>2</sup>, Joanna Grelska <sup>3,4</sup>, Karolina Jurkiewicz <sup>3,4</sup>,  
Natalina Makieieva <sup>5</sup>, Teobald Kupka <sup>5</sup>, Josć Alemán <sup>6,7</sup>, Robert Musioł <sup>2,\*</sup>, and  
Sebastian Pawlus <sup>3,4</sup>

1. Department of Experimental Physics, Wrocław University of Science and Technology, 50-370 Wrocław, Poland
2. Institute of Chemistry, University of Silesia in Katowice, 75 Pułku Piechoty 1A, 41-500 Chorzów, Poland
3. August Chełkowski Institute of Physics, University of Silesia in Katowice, 75 Pułku Piechoty 1, 41-500 Chorzow, Poland
4. Silesian Center for Education and Interdisciplinary Research, 75 Pułku Piechoty 1A, 41-500 Chorzow, Poland
5. Opole University, Faculty of Chemistry, Oleska Street 48, 45-052 Opole, Poland
6. Department of Organic Chemistry, Universidad Autónoma de Madrid, Calle Francisco Tomás y Valiente, 7, Cantoblanco, 28049 Madrid, Spain
7. Institute for Advanced Research in Chemical Sciences (IAdChem), Universidad Autónoma de Madrid, 28049 Madrid, Spain

\*robert.musiol@us.edu.pl

### **Table of contents**

1. Additional information for the molar mass – glass transition temperature relationship

2. The Avramov model

3. Fragility index of the previously published glycine imino esters

**1. Additional information for the molar mass – glass transition temperature relationship**

**Table S1.** Molar mass ( $M$ ) and glass transition temperatures ( $T_g$ ) for glycine imino esters and selected previously published compounds with C=N bonds.

| Compound                                                                            | $M$<br>(g/mol) | $T_g$ (K) | Ref. |
|-------------------------------------------------------------------------------------|----------------|-----------|------|
| 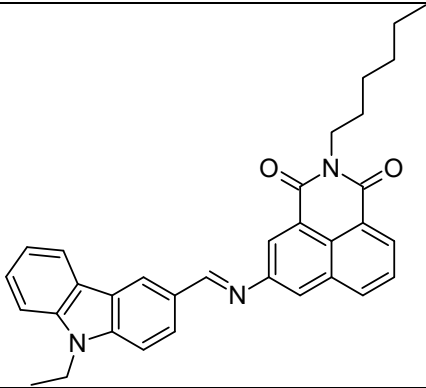  | 502            | 328       | 34   |
|  | 442            | 308       | 34   |
|  | 437.5          | 320       | 34   |

|                                                                                     |     |     |    |
|-------------------------------------------------------------------------------------|-----|-----|----|
| 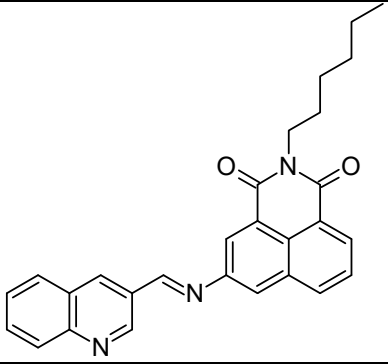   | 436 | 301 | 34 |
|    | 470 | 314 | 34 |
|   | 552 | 324 | 34 |
|  | 561 | 361 | 35 |

|                                                                                     |     |     |    |
|-------------------------------------------------------------------------------------|-----|-----|----|
| 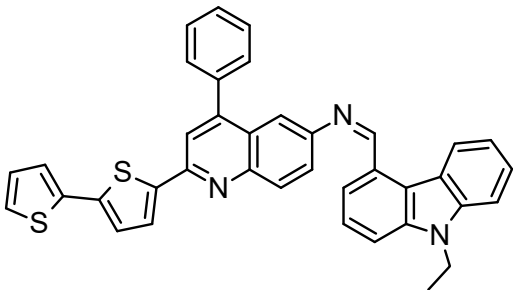   | 590 | 463 | 35 |
|    | 573 | 445 | 35 |
|    | 699 | 490 | 8  |
|   | 863 | 449 | 8  |
|  | 815 | 514 | 8  |
|  | 737 | 550 | 8  |
|  | 901 | 564 | 8  |
|  | 853 | 551 | 8  |

|                                                                                     |     |     |    |
|-------------------------------------------------------------------------------------|-----|-----|----|
| 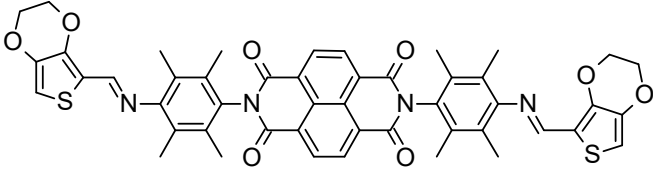   | 865 | 464 | 8  |
|    | 573 | 352 | 6  |
|    | 541 | 363 | 6  |
|    | 549 | 372 | 6  |
|    | 611 | 363 | 6  |
|   | 408 | 285 | 21 |
|  | 408 | 285 | 21 |
|  | 448 | 301 | 21 |
|  | 432 | 304 | 21 |
|  | 398 | 264 | -  |

|                                                                                   |     |     |   |
|-----------------------------------------------------------------------------------|-----|-----|---|
| 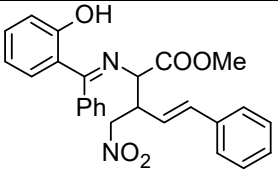 | 444 | 304 | - |
|-----------------------------------------------------------------------------------|-----|-----|---|

## 2. The Avramov model

In order to fit the pressure-temperature surface of relaxation times for compounds **1** and **2**, the Avramov model was applied. This model was originally formulated for pressure-temperature evolution of viscosity, but was adapted to deal with nonlinear, super-Arrhenius pressure and temperature dependences of dielectric relaxation times [52]. According to this model, the p-T plane of  $\tau_{Max}$  can be parametrized by the following equation of state:

$$\log \tau_{Max} = \log \tau_{\infty} + \left( \frac{T_{ref}(p_0)}{T} \right)^F \left( 1 + \frac{p}{\Pi} \right)^{\beta} \log \left( \frac{\tau_{ref}}{\tau_{\infty}} \right) \quad (1)$$

In this equation  $\tau_{\infty}$  is the minimum limit value of the relaxation time achieved at  $T \rightarrow \infty$  and  $p \rightarrow 0$ ,  $p_0$  is the atmospheric or zero pressure,  $T_{ref}(p_0)$  is a reference temperature at  $p_0$ ,  $\Pi$  is the internal pressure of the system,  $\tau_{ref}$  is the relaxation time at  $T_{ref}$ , whereas  $F$ , and  $\beta$  are thermodynamic constants given by the expressions:

$$F = F_0 \left( 1 - \frac{C}{C_{p_0}} \ln \left( \frac{\Pi + p}{\Pi + p_0} \right) \right) \approx F_0 \left( 1 - \frac{C}{C_{p_0}} \ln \left( 1 + \frac{p}{\Pi} \right) \right) \quad (2)$$

$$F_0 = \frac{2C_{p_0}}{ZR} \quad (3)$$

$$\beta = \frac{2\kappa_0 V_m}{ZR} \Pi \quad (4)$$

Herein,  $F$  is the so-called fragility parameter,  $C$  is a constant,  $C_{p_0}$  is the heat capacity at  $p_0$ ,  $R$  is the gas constant,  $Z$  is the number of channels along which the building units can leave a given position,  $\kappa_0$  is the thermal expansion coefficient and  $V_m$  is the molar volume [52].

During fitting procedure,  $\log\tau_\infty$ ,  $F$ ,  $\Pi$  and  $\beta$  parameters were used as free variables, whereas  $T_{ref}(p_0)$  was glass transition temperature under ambient pressure. Finally,  $\log\tau_{ref}$  was taken as  $\log\tau_{ref} = 2$  because the structural relaxation time at  $T_g$  is equal 100 s for low-weight glass-formers.

### 3. Fragility index of the previously published glycine imino esters

Ambient-pressure fragility index,  $m_p$ , was calculated for the previously published glycine imino esters based on their temperature dependences of structural relaxation times that can be found in Ref. 21. The obtained values are presented in Table S2.

**Table S2.** Calculated ambient-pressure fragility index,  $m_p$ , for the previously published glycine imino esters.

| Compound                                                                            | $m_p$      |
|-------------------------------------------------------------------------------------|------------|
| 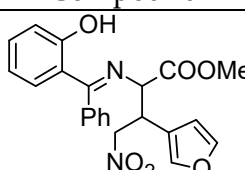  | $84 \pm 2$ |
|  | $84 \pm 2$ |
|  | $81 \pm 2$ |
|  | $80 \pm 2$ |
